# Supplementary material for: Analyzing the Mechanical Properties of Free-Standing PACA Thin Films Using Microindentation Technique
Source: MDPI journal article supplement (doi:10.3390/polym14224863), 2022-11-11
Supplement: s1 [file s1]

Supplementary Materials

# Analyzing the Mechanical Properties of Free-Standing PACA Thin Films Using Microindentation Technique

Osamah Altabal and Christian Wischke <sup>\*,†</sup>

Institute of Active Polymers, Helmholtz-Zentrum Hereon, Kantstr. 55, 14513 Teltow, Germany

\* Correspondence: christian.wischke@pharmazie.uni-halle.de; christian.wischke@hereon.de

† Current address: Institute of Pharmacy, Martin-Luther University Halle-Wittenberg, Halle, Germany.

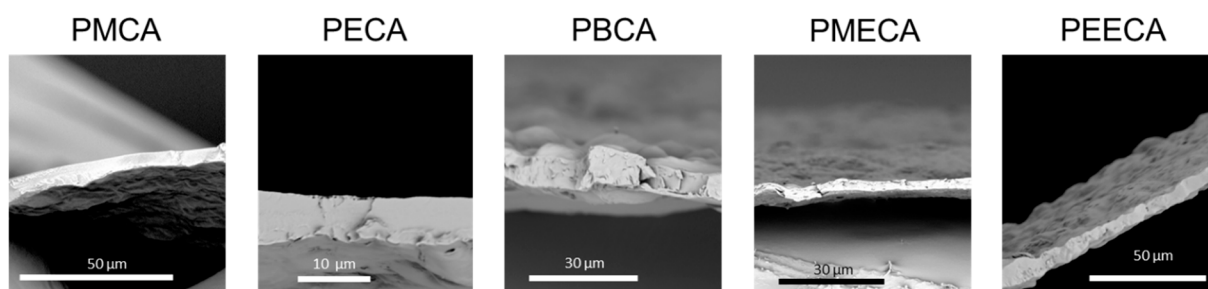

**Figure S1.** SEM images of free-standing PACA films as isolated from square-shaped polymer frames. For abbreviations, see main manuscript.

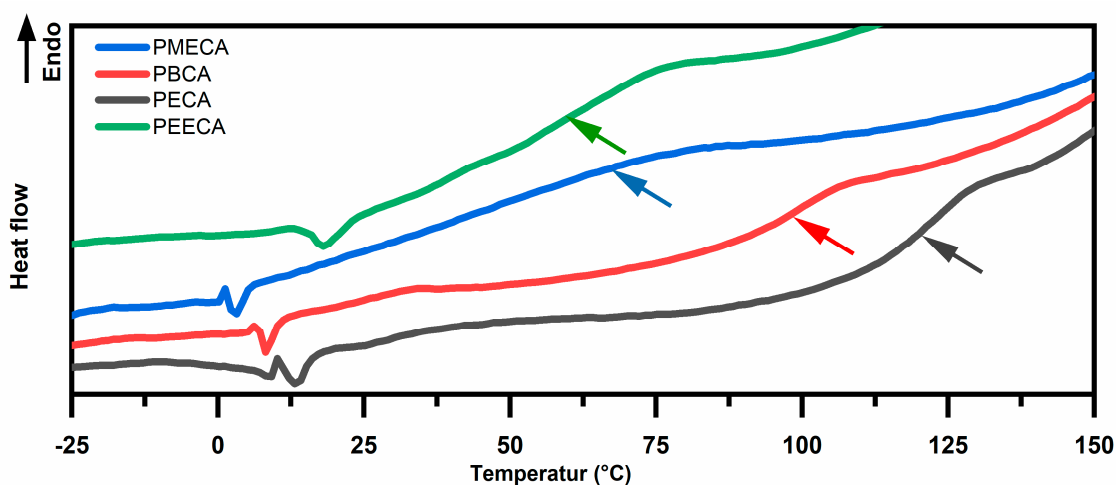

**Figure S2.** DSC thermograms (second heating run) of dry-state PACA samples. The signals in the range of 0–25 °C are assigned to movement of the multiple-piece samples during heating. The respective glass transition is indicated by arrows as determined by DSC software. For abbreviations, see main manuscript.
